# Supplementary material for: Probiotic Bifidobacterium breve MCC1274 Protects against Oxidative Stress and Neuronal Lipid Droplet Formation via PLIN4 Gene Regulation
Source: MDPI journal article supplement (doi:10.3390/microorganisms11030791), 2023-03-20
Supplement: s1 [file s1]

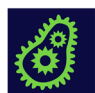**Table S1.** List of metabolites and internal standard.

| Compounds                              | Abbreviation     | Polarity | Precursor<br>(m/z) | Product<br>(m/z) | Collision<br>energy<br>(V) | CAS registry<br>number |
|----------------------------------------|------------------|----------|--------------------|------------------|----------------------------|------------------------|
| nicotinic acid                         | NA               | Positive | 124.05             | 78.042           | 21.47                      | 59-67-6                |
| nicotinamide                           | NAM              | Positive | 123.05             | 80.071           | 19.91                      | 98-92-0                |
| nicotinamide riboside                  | NR               | Positive | 255.093            | 123.071          | 10.77                      | 1341-23-7              |
| nicotinamide adenine dinucleo-<br>tide | NAD <sup>+</sup> | Positive | 664.071            | 427.97           | 26.06                      | 53-84-9                |

**Table S2.** List of human gene primers used for PCR reactions.

|       |         |                                 |
|-------|---------|---------------------------------|
| Plin1 | forward | 5'-AGTCCAGGCCTGTGTGCTTTG-3'     |
|       | reverse | 5'-GTGACTATGCAGGTGAAGGCAGTAA-3' |
| Plin2 | forward | 5'-TTCGCCTTTCGCTGCAGTC-3'       |
|       | reverse | 5'-CCGAGTCACCACACTCTGCAAT-3'    |
| Plin3 | forward | 5'-GCAAGCTTCGAGCCACCAA-3'       |
|       | reverse | 5'-GGTTCCAGCTGAGCCACATC-3'      |
| Plin4 | forward | 5'-GGAGCTGCAACCTTCGGAAA-3'      |
|       | reverse | 5'-ATCCTTGGCCCTGGACATCT-3'      |
| Plin5 | forward | 5'-TGCTGCTCAGCCTGCCATAC-3'      |
|       | reverse | 5'-AGGACCTTTATTCTGGAGGCAAATC-3' |
| GAPDH | forward | 5'-GCACCGTCAAGGCTGAGAAC-3'      |
|       | reverse | 5'-TGGTGAAGACGCCAGTGGA-3'       |
| IL-6  | forward | 5'-AAGCCAGAGCTGTGCAGATGAGTA-3'  |
|       | reverse | 5'-TGTCTGCAGCCACTGGTTC-3'       |

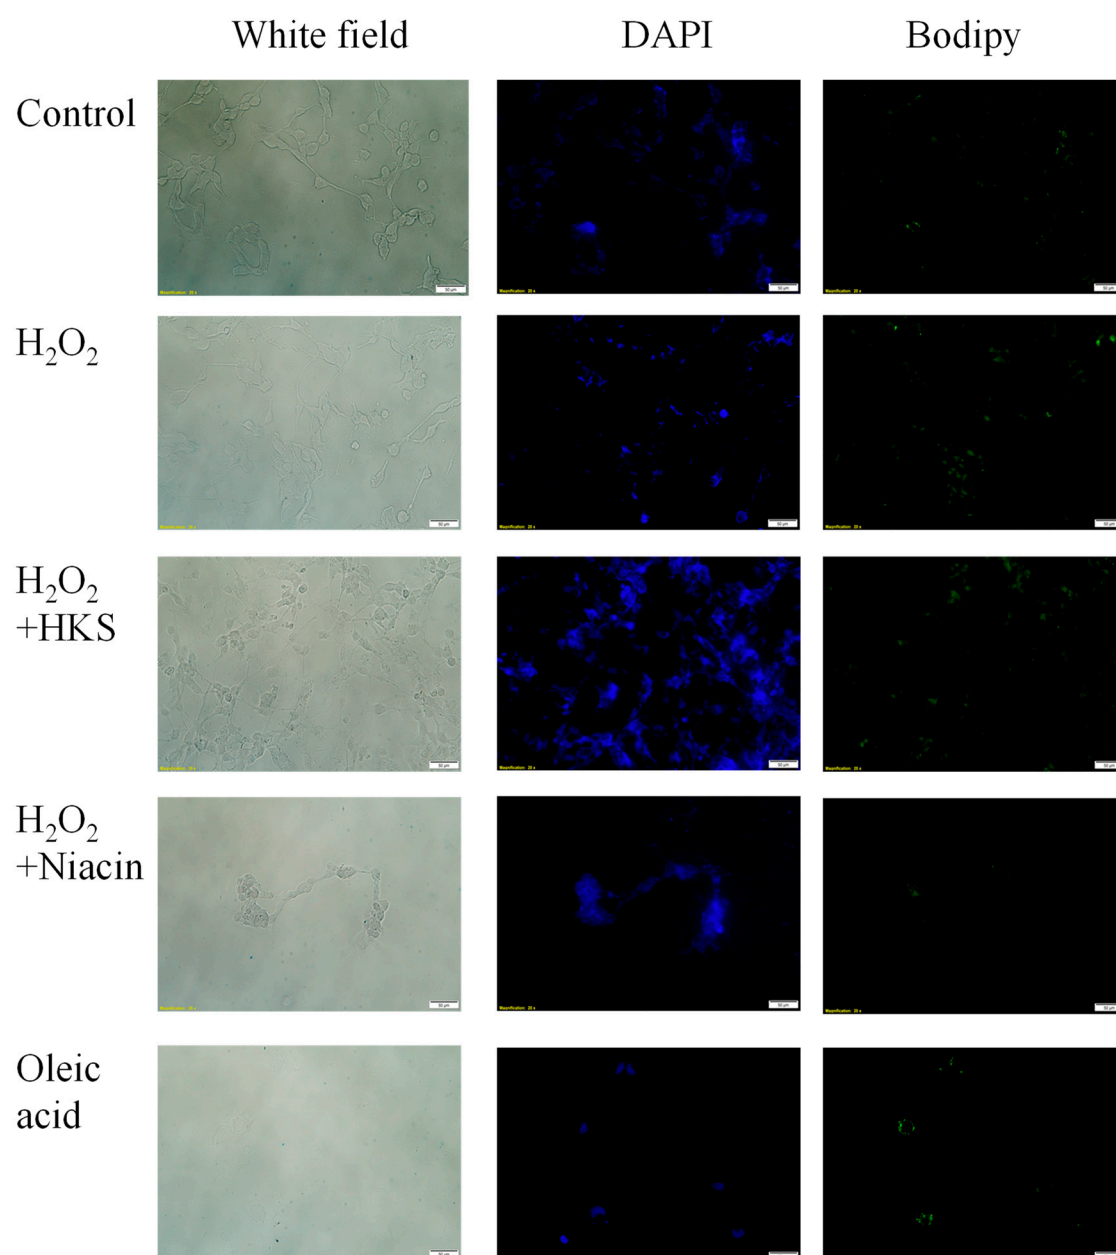

Supplementary Figure S1. Visualization of lipid droplets.

SH-SY5Y cells were exposed for 24 h to HKS (*B. breve* MCC1274 heat-killed cell extracts at 1% final v/v) or niacin (100 nM), with or without (PBS only as the control) H<sub>2</sub>O<sub>2</sub> (200 µM) and then stained with DAPI or bodipy (2 µM). Oleic acid was used as a control to confirm the induction of lipid droplets (60 µM).
